# Supplementary material for: Determining the Relationship Between Seizure-Free Days and Other Predictors of Quality of Life in Patients with Dravet Syndrome and Their Carers from FFA Registration Studies
Source: Springer Nature journal article supplement (doi:10.1007/s40120-023-00510-8), 2023-06-16

**Supplementary Material: Determining the Relationship between Seizure days, Seizure-Free Days and Other Predictors of Health-Related Quality of Life in Patients with Dravet Syndrome and Their Carers from FFA registration studies**

**Authors**

Dr Amy Pinsent<sup>1</sup>, Georgie Weston<sup>1</sup>, Dr Elisabeth J Adams<sup>1</sup>, Dr Warren Linley<sup>2</sup>, Dr Neil Hawkins<sup>3</sup>, Dr Matthias Schwenkglens<sup>4</sup>, Dr Charlotte Hamlyn-Williams<sup>1</sup>, Dr Toby Toward<sup>5</sup>

**Author affiliations**

<sup>1</sup>Aquarius Population Health, London, UK, <sup>2</sup>Paragon Market Access Ltd, Chorley, UK, <sup>3</sup>University of Glasgow, Glasgow, UK, <sup>4</sup>Institute of Pharmaceutical Medicine, University of Basel, Basel, Switzerland, <sup>5</sup>Zogenix International Ltd, Maidenhead, UK

**Correspondence: Dr Elisabeth J Adams**

Aquarius Population Health, Unit 29 Tileyard Studios, London N7 9AH, UK

Tel: +44 (0)207 993 2930

Email: [Elisabeth.adams@aquariusph.com](mailto:Elisabeth.adams@aquariusph.com)

**Table S1. Testing interaction terms following the univariate analysis for patient PedsQL.**

| <b>Covariate</b>                                                 | <b>Coefficient</b> | <b>p-value</b> | <b>Outcome variable</b> |
|------------------------------------------------------------------|--------------------|----------------|-------------------------|
| Age*28-day frequency of seizure days at baseline                 | -0.005             | >0.1           | PedsQL baseline         |
| Age*28-day frequency of SFDs at baseline                         | 0.005              | >0.1           | PedsQL baseline         |
| Age * Study                                                      | -0.157             | >0.5           | PedsQL baseline         |
| Age * Motor impairments                                          | 0.775<br>0.913     | >0.1           | PedsQL baseline         |
| 28-day frequency of seizure days at baseline *Study              | 0.045              | >0.1           | PedsQL baseline         |
| 28-day frequency of SFDs at baseline * Study                     | -0.045             | >0.1           | PedsQL baseline         |
| 28-day frequency of seizure days at baseline * Motor impairments | 0.003<br>-0.128    | >0.1<br>>0.1   | PedsQL baseline         |
| 28-day frequency of SFDs at baseline* Motor impairments          | -0.003<br>0.128    | >0.1<br>>0.1   | PedsQL baseline         |

**Table S2. Testing interaction terms following the univariate analysis for patient EQ-5D-Y data at baseline**

| <b>Covariate</b>                                                 | <b>Coefficient</b> | <b>p-value</b> | <b>Outcome variable</b> |
|------------------------------------------------------------------|--------------------|----------------|-------------------------|
| Age* 28-day frequency of seizure days at baseline                | 0.027              | >0.1           | EQ-5D-Y baseline        |
| Age* 28-day frequency of SFDs at baseline                        | -0.027             | >0.1           | EQ-5D-Y baseline        |
| Age * Study                                                      | -0.338             | >0.1           | EQ-5D-Y baseline        |
| Age * Motor impairments                                          | 1.238<br>1.736     | >0.1           | EQ-5D-Y baseline        |
| 28-day frequency of seizure days at baseline * Study             | 0.220              | >0.1           | EQ-5D-Y baseline        |
| 28-day frequency of SFDs at baseline * Study                     | -0.220             | >0.1           | EQ-5D-Y baseline        |
| 28-day frequency of seizure days at baseline * Motor impairments | 0.037<br>-0.031    | >0.1<br>>0.1   | EQ-5D-Y baseline        |
| 28-day frequency of SFDs at baseline * Motor impairments         | -0.037<br>0.031    | >0.1<br>>0.1   | EQ-5D-Y baseline        |

\*For EQ-5D-Y coefficients refer to a 0-100 scale. All utility values predicted using these coefficients were divided by 100 before the predicted relationship was estimated (shown in Figure 1).

**Table S3. Stepwise testing of covariates with the random effects components of each model analysis for patient PedSQL and EQ-5D-Y data at the 3 follow-up time points**

| <b>Covariate</b>                                         | <b>Coefficient</b> | <b>p-value</b> | <b>Outcome variable</b> |
|----------------------------------------------------------|--------------------|----------------|-------------------------|
| age + (1   variable) + (1   subjid)                      | -0.746             | <0.001         | PedsQL                  |
| seizure day 28 freq + (1   variable) + (1   subjid)      | -0.344             | <0.001         | PedsQL                  |
| seizure free day 28 freq + (1   variable) + (1   subjid) | 0.344              | <0.001         | PedsQL                  |
| Study + (1   variable) + (1   subjid)                    | 0.914              | >0.5           | PedsQL                  |
| physicalissues + (1   variable) + (1   subjid)           | -4.098<br>-10.476  | <0.05<br><0.05 | PedsQL                  |
| age + (1   variable) + (1   subjid)                      | -0.767             | <0.05          | EQ-5D-Y                 |
| seizure day 28 freq + (1   variable) + (1   subjid)      | -0.647             | <0.001         | EQ-5D-Y                 |
| seizure free day 28 freq + (1   variable) + (1   subjid) | 0.647              | <0.001         | EQ-5D-Y                 |
| Study + (1   variable) + (1   subjid)                    | 1.409              | >0.1           | EQ-5D-Y                 |
| physicalissues + (1   variable) + (1   subjid)           | -7.458<br>-15.333  | <0.01<br><0.05 | EQ-5D-Y                 |

\*For EQ-5D-Y coefficients refer to a 0-100 scale. All utility values predicted using these coefficients were divided by 100 before the predicted relationship was estimated (shown in Figure 1).

**Table S4. Testing interaction terms following the univariate analysis for carer EQ-5D-3L data at baseline**

| <b>Covariate</b>                                                 | <b>Coefficient</b> | <b>p-value</b>  | <b>Outcome variable</b> |
|------------------------------------------------------------------|--------------------|-----------------|-------------------------|
| Age* 28-day frequency of seizure days at baseline                | -0.130             | <b>&lt;0.05</b> | EQ-5D-3L baseline       |
| Age* 28-day frequency of SFDs at baseline                        | -0.130             | <b>&lt;0.05</b> | EQ-5D-3L baseline       |
| Age * Study                                                      | -1.451             | >0.1            | EQ-5D-3L baseline       |
| Age * Motor impairments                                          | 0.465<br>0.919     | >0.1            | EQ-5D-3L baseline       |
| 28-day frequency of seizure days at baseline * Study             | -0.268             | >0.1            | EQ-5D-3L baseline       |
| 28-day frequency of SFDs at baseline * study                     | 0.268              | >0.1            | EQ-5D-3L baseline       |
| 28-day frequency of seizure days at baseline * Motor impairments | 0.366<br>0.005     | >0.1<br>>0.1    | EQ-5D-3L baseline       |
| 28-day frequency of SFDs at baseline * Motor impairments         | -0.366<br>-0.005   | >0.1<br>>0.1    | EQ-5D-3L baseline       |

\*Coefficients refer to a 0-100 scale. All utility values predicted using these coefficients were divided by 100 before the predicted relationship was estimated

**Table S5. Stepwise testing of covariates with the random effects components of each model analysis for carer EQ-5D-3L data at the 3 follow-up time points**

| <b>Covariate</b>                                     | <b>Coefficient</b> | <b>p-value</b>           | <b>Outcome variable</b> |
|------------------------------------------------------|--------------------|--------------------------|-------------------------|
| age + (1 variable) + (1 subjid)                      | -0.728             | >0.05                    | EQ-5D-3L                |
| seizure day 28 freq + (1 variable) + (1 subjid)      | -0.473             | <b>&lt;0.05</b>          | EQ-5D-3L                |
| seizure free day 28 freq + (1 variable) + (1 subjid) | 0.473              | <b>&lt;0.05</b>          | EQ-5D-3L                |
| Study + (1 variable) + (1 subjid)                    | 1.770              | >0.1                     | EQ-5D-3L                |
| physicalissues + (1 variable) + (1 subjid)           | -26.821<br>-14.998 | <b>&lt;0.001</b><br>>0.1 | EQ-5D-3L                |

\*Coefficients refer to a 0-100 scale. All utility values predicted using these coefficients were divided by 100 before the predicted relationship was estimated

Figure S1. PedsQL data for 128 patients in both study groups of the trial for each follow-up point.

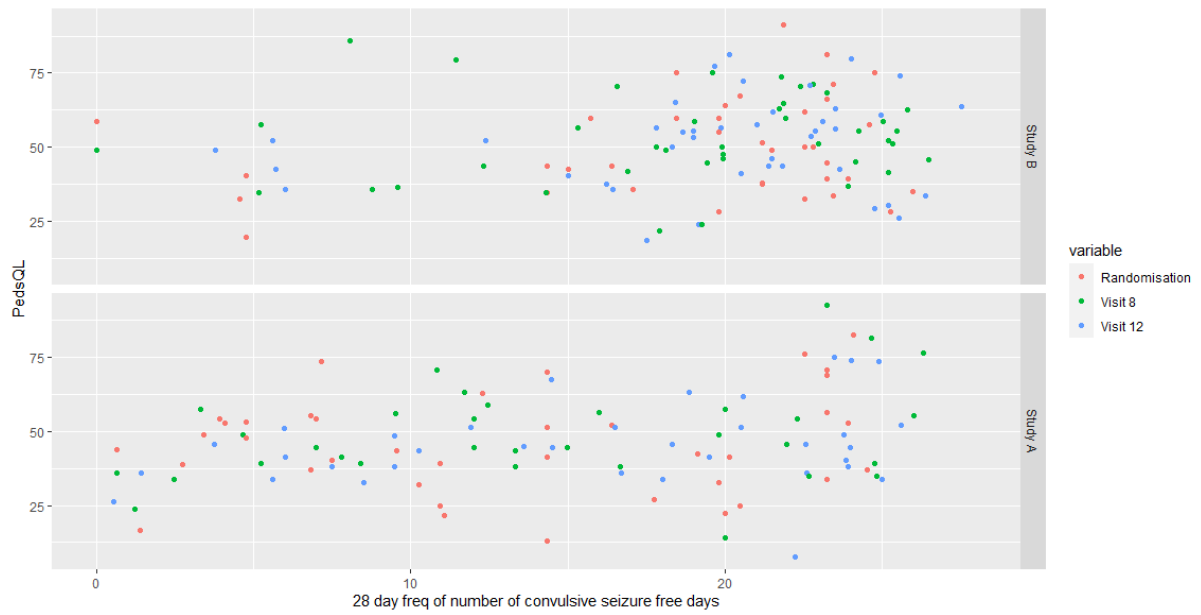

Figure S2. EQ-5D-Y data for 128 patients in both study groups of the trial for each follow-up point.

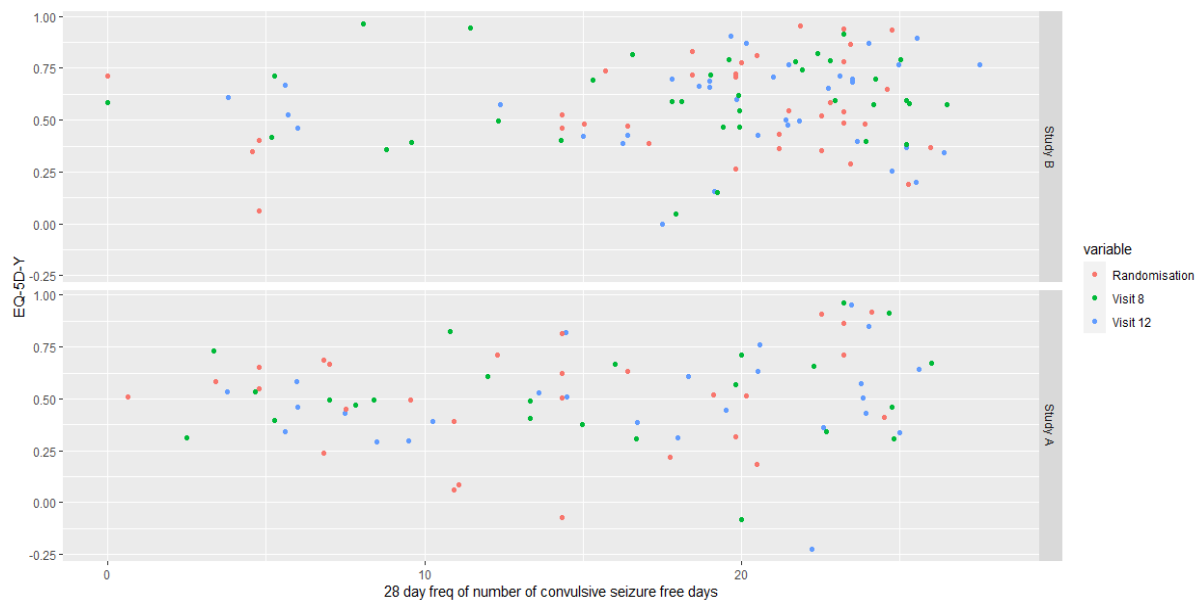

Figure S3. EQ-5D-3L data for 176 carers in both study groups of the trial for each follow-up point.

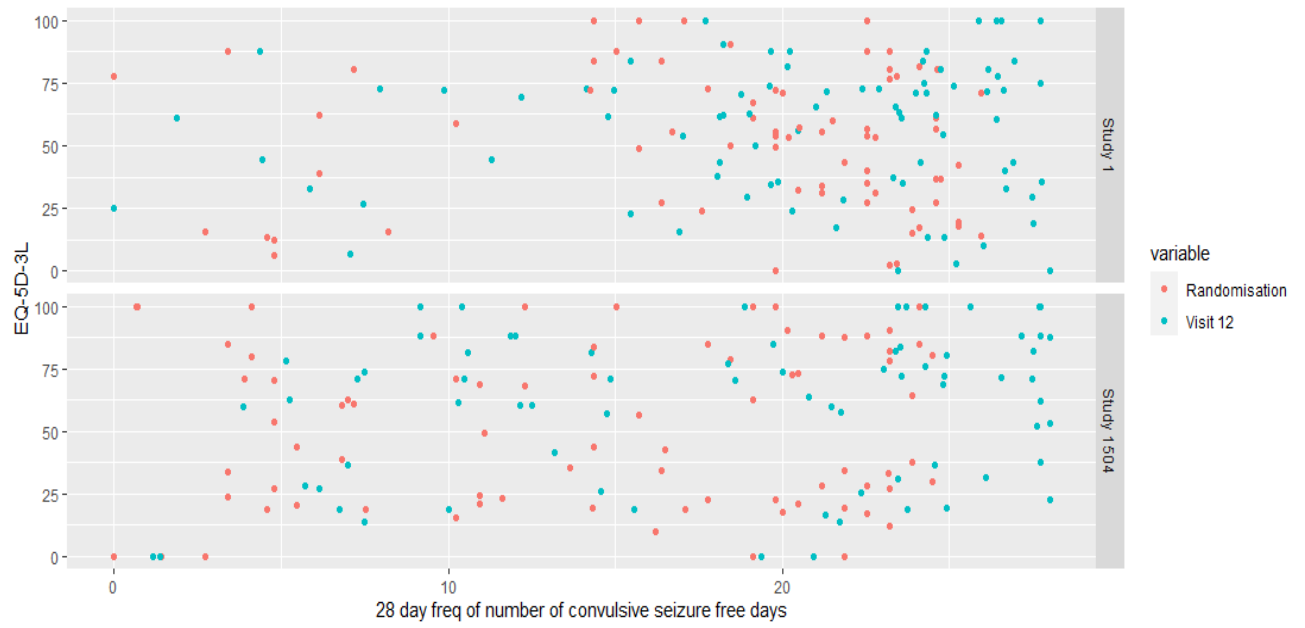

Supplement: MOESM1 [file 25501470]
